# Supplementary material for: Fractal Analysis of Root Architecture Responses of Saussurea Salsa to Different Habitats in Sugan Lake Wetland on the Northern Margin of Qinghai-Tibet Plateau
Source: Research Square preprint supplement (doi:10.21203/rs.3.rs-443185/v1), 2021-04-22
Supplement: Supplementary file 1 [file 3af79d07bf8ee6ed1327f3a8.xlsx]

## Sheet: Sheet1
S Table 3 Correlation analysis of root characteristics of Saussurea salsa
	FD	FA	TRL	RSA	RAD	RF	RBA	SRL
FD	1
FA	-.654**	1
TRL	0.034	0.016	1
RSA	-.373**	0.18	-.226*	1
RAD	-.392**	0.098	-.326**	.429**	1
RF	.512**	-0.149	.306**	-.564**	-.534**	1
RBA	-.513**	.214*	-.284**	.651**	.574**	-.842**	1
SRL	.481**	-0.151	.330**	-.561**	-.558**	.817**	-.849**	1
* p < 0.05 (bilateral); ** p < 0.01 (bilateral). For definition of the parameter abbreviations see Table 1.
